# Supplementary material
Source: MDPI journal article supplement (https://www.mdpi.com/2073-445X/10/11/1150)
Supplement: s1 [file s1]

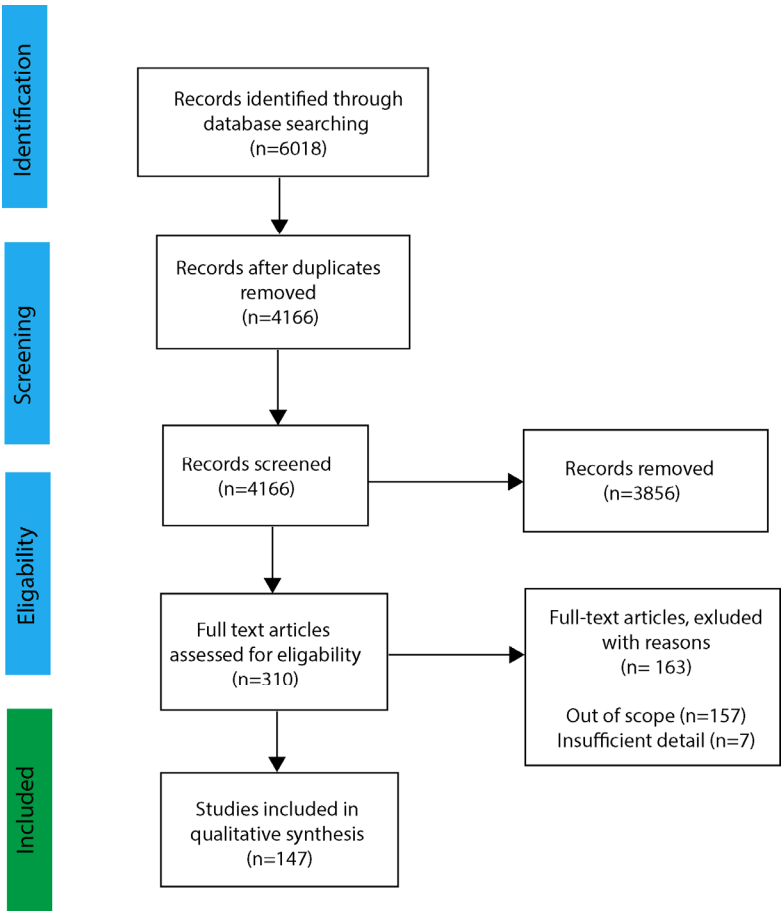

**Figure S1.** PRISMA diagram showing the literature search and exclusion process using the search terms above. Numbers in parentheses indicate the number of articles included or excluded at each step.

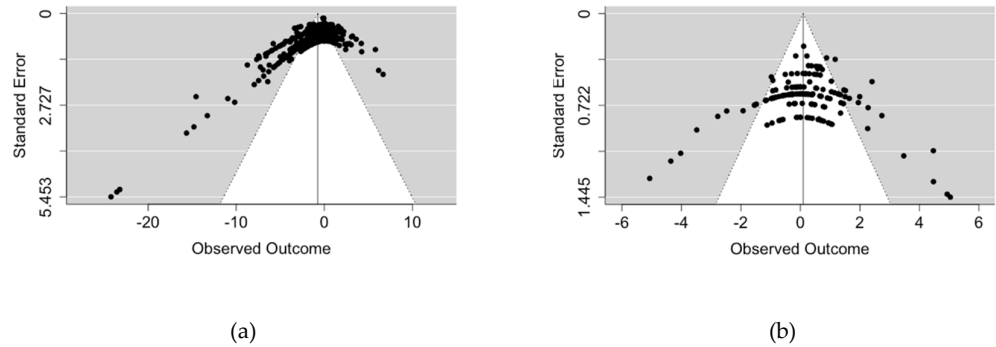

**Figure S2.** Funnel plots for datasets used in the null model of the water supply decrease (a) and increase (b) datasets. The x-axis shows observed outcome of effect size (Hedge's  $g$ ) and the y-axis shows the standard error. Note, outliers with observed outcomes  $<-54$  have been removed from the decrease dataset funnel plot.

**Table S1.** Model selection table of Multivariate Meta-analysis models explaining variation in Hedges  $g$  in the water supply decrease dataset, their  $\Delta$  Akaike Information Criterion.

| MODEL                   | AIC             | $\Delta$ AIC |
|-------------------------|-----------------|--------------|
| SPECIES + ARTICLE/STUDY | <b>3000.796</b> |              |
| SPECIES + ARTICLE       | 3081.746        | 80.95        |
| ARTICLE/STUDY           | 3090.399        | 8.653        |
| SPECIES + ARTICLE/STUDY | 3136.007        | 45.608       |
| ARTICLE                 | 3168.853        | 32.846       |
| FAMILY                  | 3416.499        | 247.646      |
| NULL                    | 3513.115        | 96.616       |

**Table S2.** Model selection table of Multivariate Meta-analysis models explaining variation in Hedges  $g$  in the water supply increase dataset, their  $\Delta$  Akaike Information Criterion.

| MODEL                   | AIC             | $\Delta$ AIC |
|-------------------------|-----------------|--------------|
| SPECIES + ARTICLE       | <b>459.7803</b> |              |
| ARTICLE                 | 460.4917        | 0.7114       |
| SPECIES + ARTICLE/STUDY | 461.2957        | 0.804        |
| ARTICLE/STUDY           | 461.9693        | 0.6736       |
| SPECIES                 | 497.6587        | 35.6894      |
| FAMILY                  | 512.5064        | 14.8477      |
| NULL                    | 532.6137        | 20.1073      |

**Table S3.** Estimates of Hedges  $g$  for each moderator variable within the water supply decrease dataset.

| CATEGORY                     | ESTIMATE | SE         | ZVAL       | PVAL       | CI.LB | CI.UB |
|------------------------------|----------|------------|------------|------------|-------|-------|
| OVERALL MEAN (491)           | -0.75    | 0.17409897 | -4.3256289 | 1.52E-05   | -1.09 | -0.41 |
| COMMUNITY (56)               | -0.71    | 0.25303591 | -2.8200091 | 0.00480223 | -1.21 | -0.22 |
| FORB (162)                   | -0.51    | 0.22599366 | -2.2732851 | 0.023009   | -0.96 | -0.07 |
| GRAMINOID (120)              | -0.73    | 0.23351541 | -3.1303313 | 0.00174609 | -1.19 | -0.27 |
| LEGUME (26)                  | -0.2     | 0.29629125 | -0.6889883 | 0.49083064 | -0.78 | 0.38  |
| SHRUB (26)                   | -0.66    | 0.36538104 | -1.8058759 | 0.07093773 | -1.38 | 0.06  |
| TREE (101)                   | -1.22    | 0.35087089 | -3.4765849 | 0.00050784 | -1.91 | -0.53 |
| IMMATURE (318)               | -0.8     | 0.24365677 | -3.3000534 | 0.00096666 | -1.28 | -0.33 |
| MATURE (173)                 | -0.7     | 0.24770242 | -2.8354026 | 0.0045768  | -1.19 | -0.22 |
| COMMON GARDEN (79)           | -0.56    | 0.38086353 | -1.474168  | 0.14043636 | -1.31 | 0.19  |
| CONTROLLED ENVIRONMENT (212) | -0.85    | 0.25054731 | -3.3970046 | 0.00068128 | -1.34 | -0.36 |
| IN-SITU (200)                | -0.72    | 0.31590534 | -2.2929604 | 0.02185029 | -1.34 | -0.11 |
| ABOVE-GROUND BIOMASS (206)   | -0.97    | 0.16400585 | -5.9183439 | 3.25E-09   | -1.29 | -0.65 |
| BELOW-GROUND BIOMASS (38)    | -0.47    | 0.18391452 | -2.5766031 | 0.00997764 | -0.83 | -0.11 |
| HEAT RESISTANCE (6)          | 0.75     | 0.67730773 | 1.10877763 | 0.26752612 | -0.58 | 2.08  |
| PERCENT COVER (18)           | -0.83    | 0.34392337 | -2.4012787 | 0.01633789 | -1.5  | -0.15 |
| RATE OF PHOTOSYNTHESIS (104) | -1.65    | 0.17361961 | -9.4984232 | 2.13E-21   | -1.99 | -1.31 |
| QUANTUM YIELD PSII (35)      | -0.44    | 0.20248879 | -2.1682191 | 0.03014202 | -0.84 | -0.04 |
| ROOT:SHOOT (79)              | 0.66     | 0.16735805 | 3.94344367 | 8.03E-05   | 0.33  | 0.99  |
| SPECIES RICHNESS (5)         | -0.8     | 0.39947679 | -2.0135605 | 0.04405569 | -1.59 | -0.02 |
| 0-20% (44)                   | -0.43    | 0.24774266 | -1.7304499 | 0.08354993 | -0.91 | 0.06  |
| 21-40% (134)                 | -0.47    | 0.21472401 | -2.1809053 | 0.02919043 | -0.89 | -0.05 |

|               |       |            |            |            |       |       |
|---------------|-------|------------|------------|------------|-------|-------|
| 41–60% (144)  | –0.67 | 0.21449393 | –3.1284941 | 0.00175705 | –1.09 | –0.25 |
| 61–80% (66)   | –1.09 | 0.22293026 | –4.8974825 | 9.71E-07   | –1.53 | –0.65 |
| 81–100% (103) | –0.89 | 0.23553992 | –3.785246  | 0.00015356 | –1.35 | –0.43 |

**Table S4.** Estimates of Hedges  $g$  for each moderator variable within the water supply increase dataset.

| CATEGORY                      | ESTIMATE | SE         | ZVAL       | PVAL       | CI.LB | CI.UB |
|-------------------------------|----------|------------|------------|------------|-------|-------|
| OVERALL MEAN (156)            | 0.1      | 0.26904698 | 0.35621413 | 0.72168021 | –0.43 | 0.62  |
| COMMUNITY (54)                | –0.12    | 0.33645839 | –0.3644534 | 0.71551945 | –0.78 | 0.54  |
| FORB (27)                     | –0.01    | 0.33412212 | –0.0413689 | 0.96700183 | –0.67 | 0.64  |
| GRAMINOID (47)                | 0.18     | 0.320774   | 0.56823108 | 0.56987807 | –0.45 | 0.81  |
| LEGUME (12)                   | –0.03    | 0.37299598 | –0.0732101 | 0.9416389  | –0.76 | 0.7   |
| SHRUB (10)                    | –0.53    | 0.44059639 | –1.2020132 | 0.22935842 | –1.39 | 0.33  |
| TREE (6)                      | 0.34     | 0.75333526 | 0.45523863 | 0.64893757 | –1.13 | 1.82  |
| ABOVE-GROUND<br>BIOMASS (85)  | 0.44     | 0.30719641 | 1.42449929 | 0.15430199 | –0.16 | 1.04  |
| BELOW-GROUND<br>BIOMASS (6)   | 0.35     | 0.43193662 | 0.80610678 | 0.42018129 | –0.5  | 1.19  |
| FREEZING RESISTANCE<br>(12)   | –1.45    | 0.57381452 | –2.5271049 | 0.01150071 | –2.57 | –0.33 |
| PERCENT COVER (35)            | 0.24     | 0.3408286  | 0.69273177 | 0.4884779  | –0.43 | 0.9   |
| RATE OF<br>PHOTOSYNTHESIS (6) | 0.59     | 0.4623429  | 1.27782797 | 0.20131009 | –0.32 | 1.5   |
| QUANTUM YIELD PSII (4)        | 0.4      | 0.38430321 | 1.0346308  | 0.30084136 | –0.36 | 1.15  |
| SPECIES RICHNESS (8)          | 0.48     | 0.41102042 | 1.17224296 | 0.24109952 | –0.32 | 1.29  |
| 0–20% (26)                    | 0.21     | 0.41630158 | 0.49638863 | 0.61962025 | –0.61 | 1.02  |
| 101–120% (4)                  | 0.16     | 0.99579875 | 0.15681773 | 0.8753885  | –1.8  | 2.11  |
| 21–40% (26)                   | 0.31     | 0.41205714 | 0.74863577 | 0.45407677 | –0.5  | 1.12  |
| 41–60% (46)                   | 0        | 0.43807865 | –0.0090797 | 0.99275553 | –0.86 | 0.85  |
| SUPPLEMENTAL (47)             | 0.16     | 0.37779729 | 0.43319195 | 0.66487533 | –0.58 | 0.9   |
